# Supplementary material
Source: Springer Nature journal article supplement (https://www.springermedizin.de/resource/supplementary/12245_2011_123_MOESM4_ESM.pdf/9672760)

# Frequency of ALI Development Varies With Predisposing Conditions

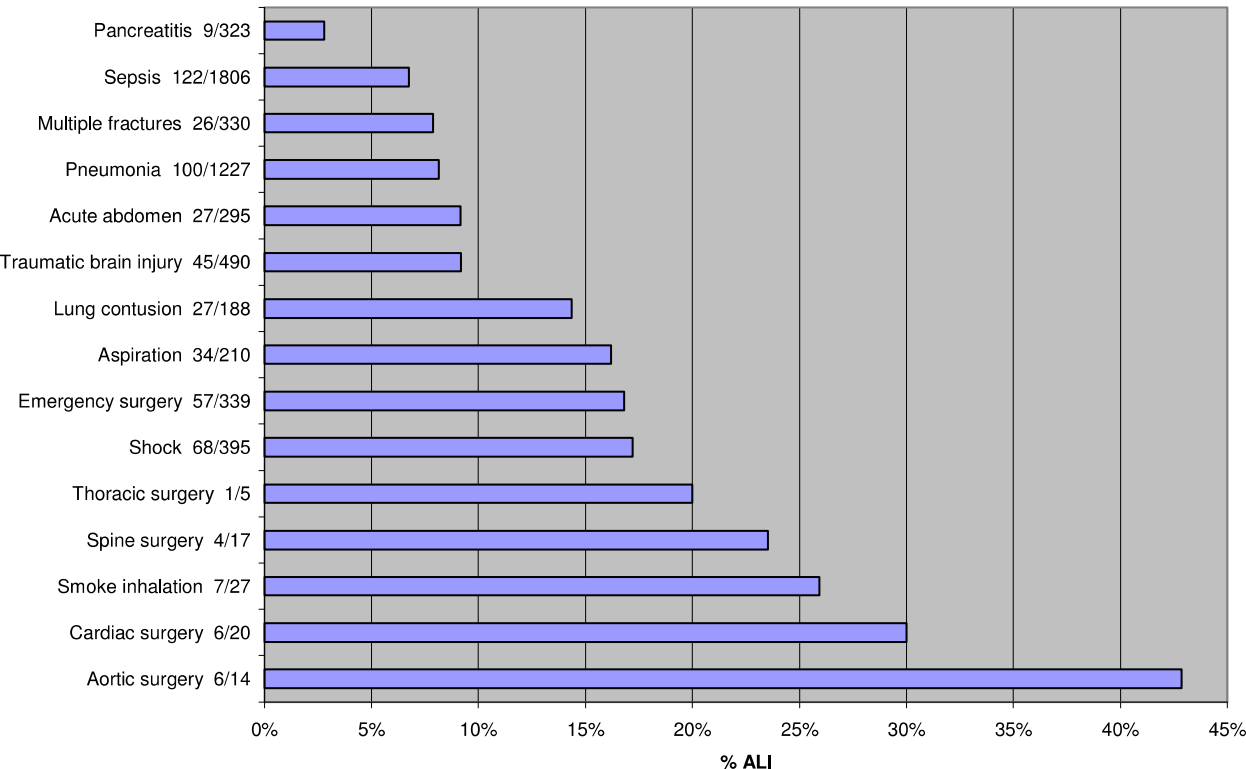

Supplement: MOESM4 [file 9672760]
